# Supplementary material for: Modic changes in patients with lumbar disc herniation followed more than 1 year after lumbar discectomy: a systematic review and meta-analysis
Source: PeerJ. 2024 Aug 7;12:e17851. doi: 10.7717/peerj.17851 (PMC11316466; doi:10.7717/peerj.17851)
Supplement: Supplemental Information 1 [file peerj-12-17851-s001.xlsx]

## Sheet: Sheet1
Database	Search strategy
PubMed	((low back pain[Title/Abstract]) OR (LBP[Title/Abstract])) AND ((Modic changes[Title/Abstract]) OR (VESC[Title/Abstract])) AND (Discectomy[Title/Abstract])
Web of Science	#1:"Topic": Modic changes #2:"Topic": Low back pain #3: "Topic": Discectomy #4: #1 AND #2 AND #3
Embase	Modic changes':ab,ti OR 'VESC':ab,ti AND 'Low back pain':ab,ti AND 'Discectomy':ab,ti
Cochrane Library	Advanced research: Select "Title Abstract Keyword"-Discectomy+AND "Title Abstract Keyword"-Low back pain+AND "Title Abstract Keyword"- Modic changes OR "Title Abstract Keyword"-VESC
