# Supplementary material for: Modic changes in patients with lumbar disc herniation followed more than 1 year after lumbar discectomy: a systematic review and meta-analysis
Source: PeerJ. 2024 Aug 7;12:e17851. doi: 10.7717/peerj.17851 (PMC11316466; doi:10.7717/peerj.17851)
Supplement: Supplemental Information 3 — The case number and modic types of all included articles. [file peerj-12-17851-s003.xlsx]

## Sheet: Sheet1
	Type0 to					Type1 to					Type2 to					Type3 to					Total	Type0 total	Type1 total	Type2 total	Type3 total
	Type0	Type1	Type2	Type3	Mixed Type1 and 2	Type0	Type1	Type2	Type3	Mixed Type1 and 2	Type0	Type1	Type2	Type3	Mixed Type1 and 2	Type0	Type1	Type2	Type3	Mixed Type1 and 2
Kawaguchi 2023 (1year)	67	6	14	0	9	0	0	0	0	0	0	0	0	0	0	0	0	0	0	0	96	96	0	0	0
Takahashi 2021 (1year)	40	4	3	1	0	0	2	1	0	0	0	1	8	1	0	0	1	0	0	0	62	48	3	10	1
Yaman 2017 (1year)	5	2	0	0	0	0	4	0	0	0	0	0	11	0	0	0	0	0	3	0	25	7	4	11	3
Barzouhi 2014 (1year)	32	59	22	0	13	0	7	2	0	0	0	16	7	0	7	0	0	0	0	0	165	126	9	30	0
Bostelmann 2019 (2year)	56	20	23	0	0	1	16	8	0	0	12	28	64	2	0	0	0	1	0	0	231	99	25	106	1
Lee 2015 (2year)	18	6	0	0	0	0	1	0	0	0	0	0	3	0	0	0	0	0	0	0	28	24	1	3	0
Ohtori 2010 (2year)	19	1	3	0	0	0	20	3	0	0	0	0	0	0	0	0	0	0	0	0	46	23	23	0	0
Rahme 2010 (3-5year)	9	4	9	0	0	0	2	3	0	0	0	0	14	0	0	0	0	0	0	0	41	22	5	14	0
																					694	445	70	174	5
	29	0	0	0
	8	1	2	1
	2	0	0	0
	94	2	23	0
	43	9	42	1
	6	0	0	0
	4	3	0	0
	#REF!	#REF!	#REF!	#REF!
	13	3	0	0
